# Supplementary material
Source: PubMed Central journal article supplement (PMC3370482)
Supplement: supp_78.13.4613_AEM-AEM00474-12-s02.pdf [file supp_78.13.4613_AEM-AEM00474-12-s02.pdf]

**TABLE S1.** Oligonucleotides used in this study

| <b>Name</b> | <b>Sequence</b>                            |
|-------------|--------------------------------------------|
| alfAper1    | GGGCTGCAGGAATTCGATATCGCCACGATTATTGTGACGG   |
| alfAper2    | GGTATCGATAAGCTTGATATCTGACAATACCGATGAGTAAG  |
| alfBmanC1   | GGGCTGCAGGAATTCGATATCTTGGTGTCCGGTACTTACGG  |
| alfBmanC2   | GGTATCGATAAGCTTGATATCTGACTAAGTACGAGATAAATC |
| alfCper1    | GGGCTGCAGGAATTCGATATCATCCAGCGATTTTGATTTCCG |
| alfCper2    | GGGCTGCAGGAATTCGATATCATCCAGCGATTTTGATTTCCG |
| regFucB1    | GGGCTGCAGGAATTCGATATCCGCGTTACACGTATTAAGG   |
| regFucB2    | GGTATCGATAAGCTTGATATCAGGTTTGCCGGAAGTCTG    |
| IIABFucB1   | GGTATCGATAAGCTTGATATCCGATTAGCTCACAAGTTCGG  |
| fucB1       | AGAACTAGTGGATCCCCCGGG CTTTGTACAACACGGGTGC  |
| qRegFucBfw  | CACCCAGCGCAATTTGGCGG                       |
| qRegFucBrv  | TGTTGTTCCAGGGCGCTCGGG                      |
| qAlfBfw     | TGCATGCGCCAGCAAGACGA                       |
| qAlfBrv     | GGTGTGTGCCAATCATAGGTGGCC                   |
| qIIABfucBfw | CGCTGAATGCCACGCGCATC                       |
| qIIABfucBrv | TGAACGCCACCGGGAACAGC                       |
| qIICfucBfw  | GTTGTTGGCGCAACGCTGCA                       |
| qIICfucBrv  | AACCAACTGGCACCGCGAGG                       |
| qIIDfucBfw  | AGCGGGCCTCATGGGTCCTT                       |
| qIIDfucBrv  | CAGCCCCATATACGCGCCGA                       |
| qAlfAfw     | AGCACCACGACGGCTTTGTCA                      |
| qAlfArv     | GGCACGAACAGCTTGGGCCA                       |
| qAlfCfw     | AGCCGGGCTCAAGTTTGGCC                       |
| qAlfCrv     | ATCCCAAGTCGTGCCAGCGG                       |
